# Supplementary material
Source: Springer Nature journal article supplement (https://www.springermedizin.de/resource/supplementary/12967_2012_1514_MOESM5_ESM.pdf/9574202)

# CTLA-4 expression

# Ipilimumab reactivity

**A**
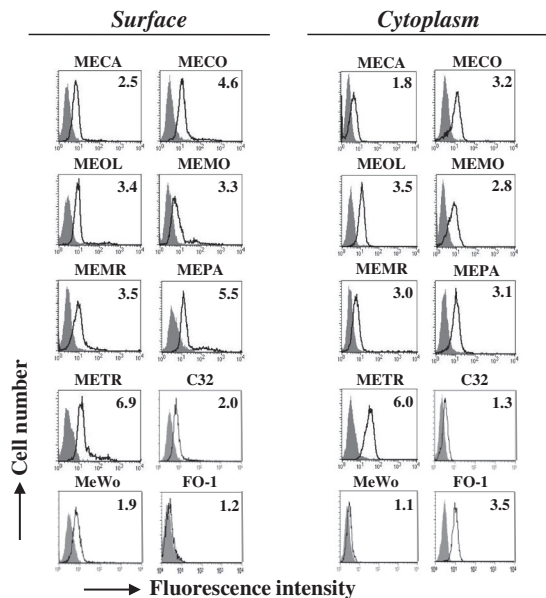
**B**
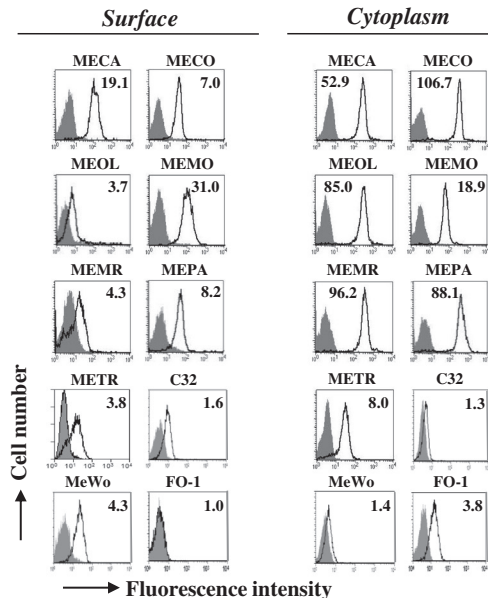
**C**
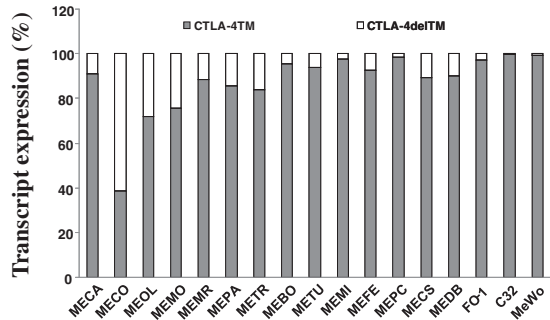
**D**
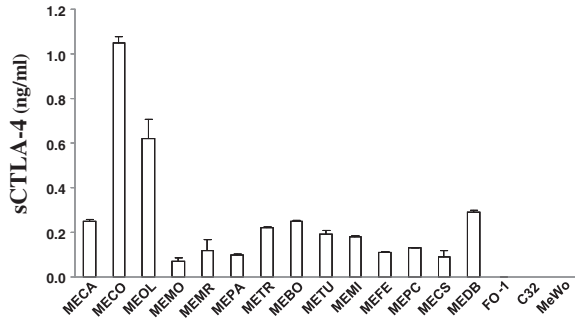

Supplement: MOESM5 [file 9574202]
